# Supplementary material for: Morphology control towards a greener, non-halogenated solvent system processed CH3NH3PbI3 film for high performance perovskite solar cells
Source: Royal Society of Chemistry journal article supplement (doi:10.1039/c9tc00812h), 2019-01-01
Supplement: c9tc00812h1.pdf [file c9tc00812h1.pdf]

## *Electronic Supplementary Information*

### **Morphology Control towards Greener, Non-halogenated Solvent System Processed**

#### **CH<sub>3</sub>NH<sub>3</sub>PbI<sub>3</sub> Film for High Performance Perovskite Solar Cells**

*Wan-Yi Tan, Peng-Peng Cheng, Yong-Wen Zhang, Jia-Ming Liang, Xudong Chen, Yidong Liu,\*  
and Yong Min\**

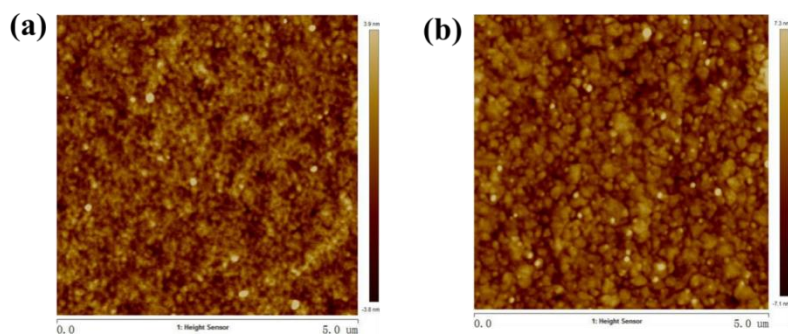

**Figure S1** Topographic atomic force microscopy (AFM) images (5 μm × 5 μm) of (a) the p-perovskite film,  $R_{\text{rms}} = 1.15$  nm, and (b) m-perovskite film,  $R_{\text{rms}} = 2.04$  nm. Both of the thin-films were deposited on ITO/NiO<sub>x</sub> substrates.

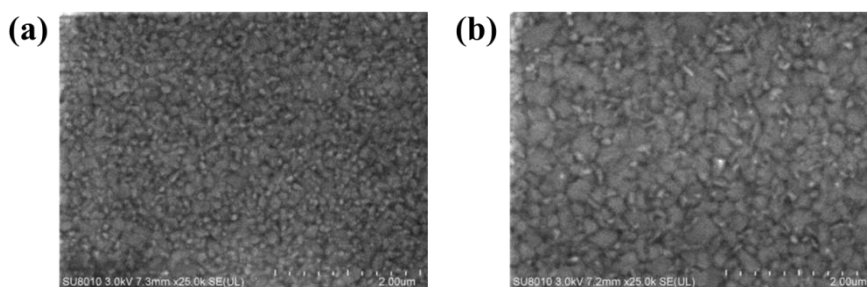

**Figure S2** SEM images of (a) the p-perovskite film and (b) m-perovskite film. Both of the thin-films were deposited on ITO/NiO<sub>x</sub> substrates and covered with PC<sub>61</sub>BM layer.

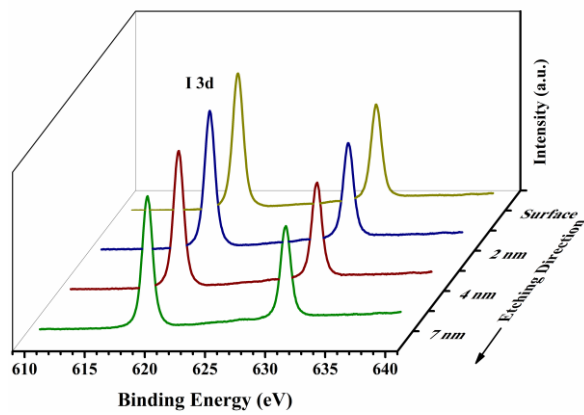

**Figure S3** XPS depth profiling of I component in m-perovskite film.

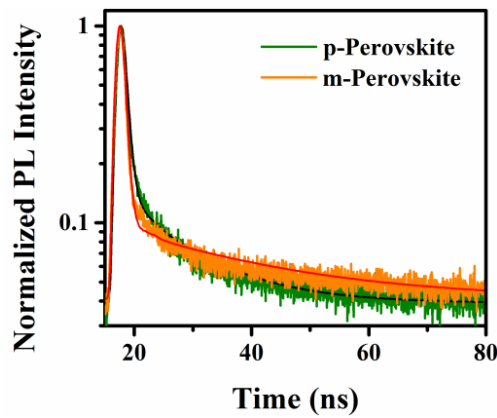

**Figure S4** Normalized transient PL decay profiles of the p-perovskite film and m-perovskite film measured at 780 nm, from the air side.

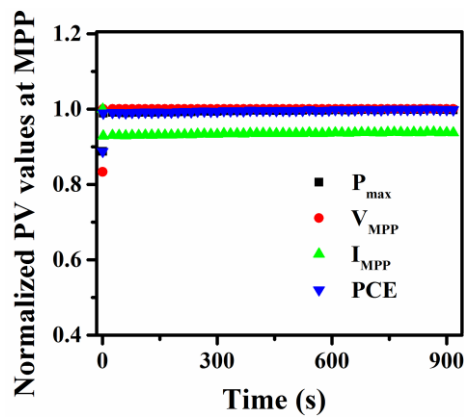

**Figure S5** Stabilized power output of m-PSC, obtained at a maximum power point (MPP).

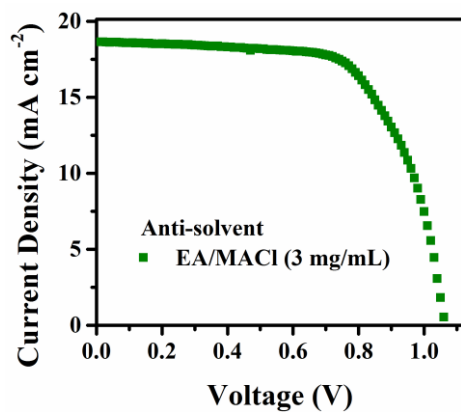

**Figure S6** Current density ( $J$ )–voltage ( $V$ ) characteristics of the reverse swept MAPbI<sub>3</sub> PSC with the perovskite layer using EA/MACl (3 mg/mL) as the anti-solvent.

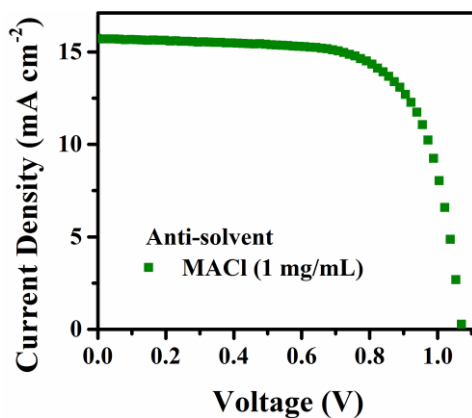

**Figure S7** Current density ( $J$ )–voltage ( $V$ ) characteristics of the reverse swept MAPbI<sub>3</sub> PSC with the perovskite layer only modified by MACl.

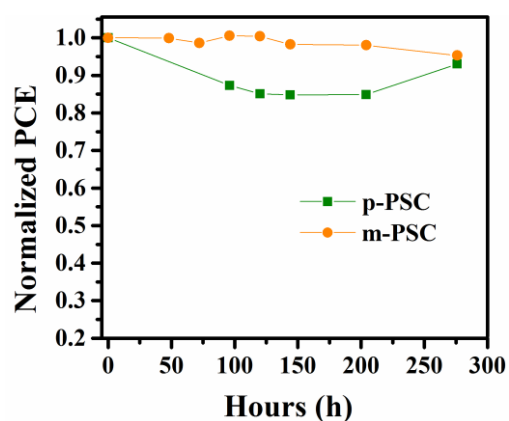

**Figure S8** Stability of PSCs based on p-perovskite and m-perovskite films, which stored in ambient air at ~53% humidity in the dark.

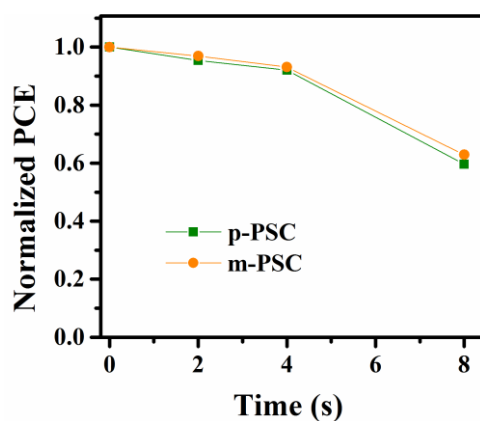

**Figure S9** Stability of PSCs based on p-perovskite and m-perovskite films, which thermally annealed at 85 °C.

**Table S1** Comparison of the PCE of NMP-processed PSCs reported in this work and in the literatures.

| Precursor solvent       | Anti-solvent                | Device configuration                                                                                                                                                       | Thermal annealing condition               | PCE    | Ref. |
|-------------------------|-----------------------------|----------------------------------------------------------------------------------------------------------------------------------------------------------------------------|-------------------------------------------|--------|------|
| NMP                     | Dipping in ether for 30 min | FTO/c-TiO <sub>2</sub> /TiO <sub>2</sub> /MAPbI <sub>3</sub> /Al <sub>2</sub> O <sub>3</sub> /Carbon                                                                       | Room-temperature annealing for over 100 h | 12.3%  | 1    |
| NMP                     | None                        | FTO/c-TiO <sub>2</sub> /TiO <sub>2</sub> /MAPbI <sub>3</sub> /Al <sub>2</sub> O <sub>3</sub> /Carbon                                                                       | Slow crystallization for 120 h            | 15.0%  | 2    |
| GBL:DMSO:NMP (2:2:1)    | CB                          | ITO/PEDOT:PSS/MAPbI <sub>3</sub> /PCBM/LiF/Al                                                                                                                              | Thermally annealed at 85 °C for 1 h       | 12.3%  | 3    |
| DMAc/NMP (4:1)          | Toluene                     | FTO/compact TiO <sub>2</sub> /mesoporous TiO <sub>2</sub> /MAPbI <sub>3</sub> /spiro-OMeTAD/Au                                                                             | Annealing free                            | 17.09% | 4    |
| DMF/DMSO/NMP (4:1:0.25) | CB                          | FTO/TiO <sub>2</sub> /Cs <sub>0.05</sub> (MA <sub>0.17</sub> FA <sub>0.83</sub> ) <sub>0.95</sub> Pb(I <sub>0.83</sub> Br <sub>0.17</sub> ) <sub>3</sub> /spiro-OMe-TAD/Au | Thermally annealed at 100 °C for 1 h      | 19.61% | 5    |
| DMAc/NMP (5:1)          | Toluene                     | FTO/TiO <sub>2</sub> /MAPbI <sub>3</sub> /spiro-OMeTAD/Ag                                                                                                                  | Thermally annealed at 105 °C for 10 min   | 15.25% | 6    |

**Table S2** Time resolved photoluminescence characterization of the p-perovskite film and m-perovskite film on ITO/NiO<sub>x</sub> substrates.

| Active layer | $\tau_1$ (ns) | Fraction 1 | $\tau_2$ (ns) | Fraction 2 |
|--------------|---------------|------------|---------------|------------|
| p-Perovskite | 0.7           | 61.79%     | 11.9          | 38.21%     |
| m-Perovskite | 0.55          | 56.52%     | 25.5          | 43.48%     |

**Table S3** The photovoltaic performance of the reverse swept MAPbI<sub>3</sub> PSCs with the perovskite layer using different anti-solvents.

| Anti-solvent      | PCE (%) | $J_{SC}$ (mA cm <sup>-2</sup> ) | $V_{OC}$ (V) | FF (%) | $R_s$ ( $\Omega$ cm <sup>2</sup> ) | $R_{sh}$ (k $\Omega$ cm <sup>2</sup> ) |
|-------------------|---------|---------------------------------|--------------|--------|------------------------------------|----------------------------------------|
| EA/MACI (3 mg/mL) | 13.16   | 18.65                           | 1.06         | 66.55  | 4.44                               | 1.48                                   |
| MACI (1 mg/mL)    | 11.71   | 15.70                           | 1.07         | 69.66  | 4.21                               | 1.57                                   |

## Reference

- 1 C. Y. Chan, Y. Y. Wang, G. W. Wu, E. W. G. Diau, *J. Mater. Chem. A*, 2016, **4**, 3872–3878.
- 2 C. M. Tsai, G. W. Wu, S. Narra, H. M. Chang, N. Mohanta, H. P. Wu, C. L. Wang, E. W. G. Diau, *J. Mater. Chem. A*, 2017, **5**, 739–747.
- 3 L. Xie, H. Hwang, M. Kim, K. Kim, *Phys. Chem. Chem. Phys.*, 2017, **19**, 1143–1150.
- 4 X. Fang, Y. H. Wu, Y. T. Lu, Y. Sun, S. Zhang, J. Zhang, W. H. Zhang, N. Y. Yuan, J. N. Ding, *J. Mater. Chem. C*, 2017, **5**, 842–847.
- 5 T. Y. Wu, J. H. Wu, Y. G. Tu, X. He, Z. Lan, M. L. Huang, J. M. Lin, *J. Power Sources*, 2017, **365**, 1–6.
- 6 M. H. Lv, W. Lv, X. Fang, P. Sun, B. C. Lin, S. Zhang, *RSC Adv.*, 2016, **6**, 35044–35050.
